# Supplementary material for: Controllable synthesis of TiO2hierarchical and their applications in lithium ion batteries
Source: Royal Society of Chemistry journal article supplement (doi:10.1039/c4ra08474h), 2014-09-04
Supplement: c4ra08474h1.pdf [file c4ra08474h1.pdf]

## Supporting Information

### Controllable synthesis of TiO<sub>2</sub> hierarchical nanostructures and their applications in lithium ion batteries

Xinxin Fu, Binbin Wang, Zhimin Ren, Chenyao Fan, Guodong Qian and Zhiyu Wang<sup>\*a</sup>

<sup>a</sup> State Key Laboratory of Silicon Materials, Department of Materials Science and Engineering, Zhejiang University, Hangzhou, China.

<sup>\*</sup>To whom correspondence should be addressed. E-mail: [wangzhiyu@zju.edu.cn](mailto:wangzhiyu@zju.edu.cn)

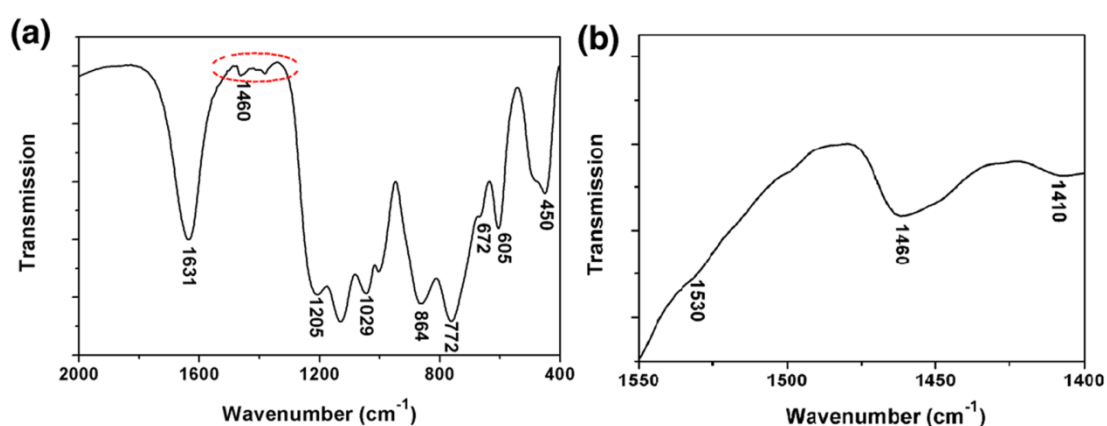

**Figure S1** FTIR patterns of the white precipitates obtained without hydrothermal treatment in the Ti(SO<sub>4</sub>)<sub>2</sub>-CH<sub>3</sub>COOH system. Chart (b) is a zoom of chart (a) in the range 1400-1550 cm<sup>-1</sup>.

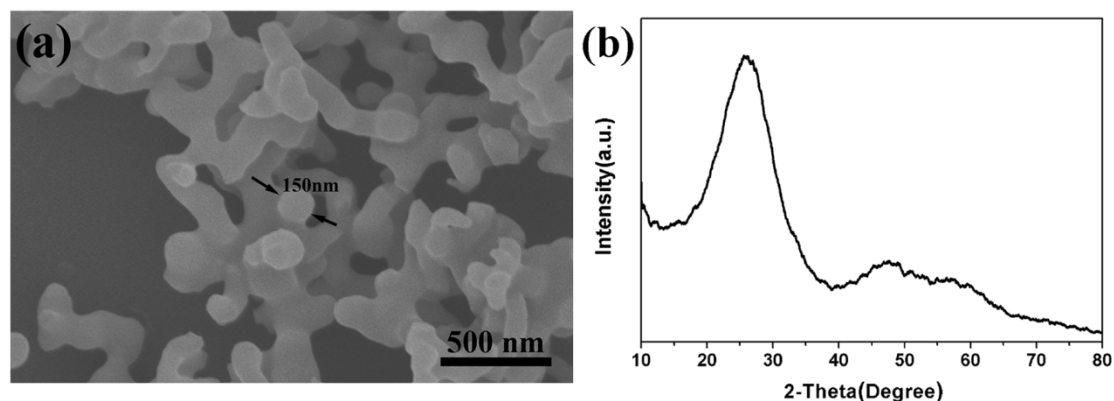

**Figure S2** The SEM image and XRD pattern of the white precipitates obtained in the mixture of Ti(SO<sub>4</sub>)<sub>2</sub> and CH<sub>3</sub>COOH solution without hydrothermal treatment.

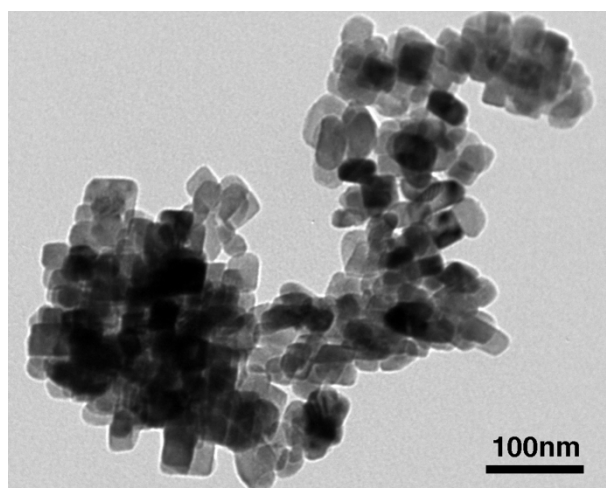

**Figure S3** The TEM image of  $\text{TiO}_2$  nanoparticles obtained in the high concentration of  $\text{Ti}(\text{SO}_4)_2$ .

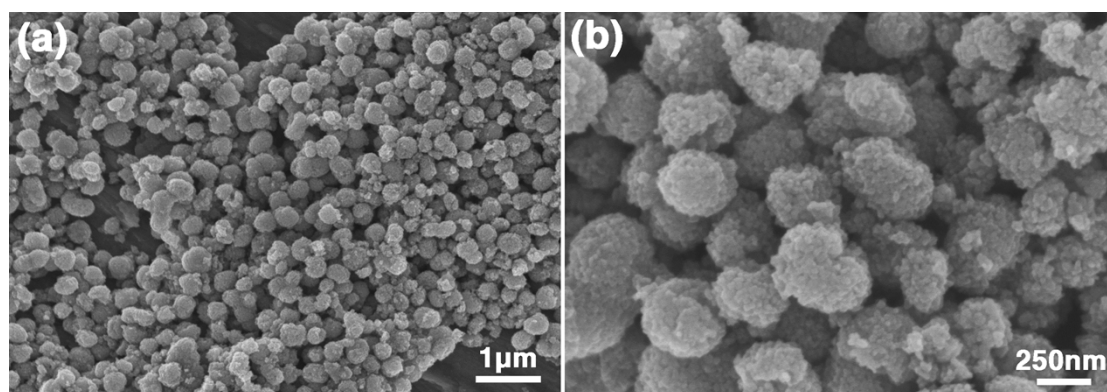

**Figure S4** SEM images of  $\text{TiO}_2$  hierarchical nanostructures after running 50 cycles at 1C in coin cells.
